# Supplementary material for: Mesoporous TiO2/TiC@C Composite Membranes with Stable TiO2-C Interface for Robust Lithium Storage
Source: PubMed Central journal article supplement — iScience. 2018 Apr 18;3:149–60. doi: 10.1016/j.isci.2018.04.009 (PMC6137325; doi:10.1016/j.isci.2018.04.009), 2018-04-18
Supplement: mmc1.pdf [file mmc1.pdf]

ISCI, Volume 3

## Supplemental Information

**Mesoporous TiO<sub>2</sub>/TiC@C Composite**

**Membranes with Stable TiO<sub>2</sub>-C**

**Interface for Robust Lithium Storage**

**Wei Zhang, Lianhai Zu, Biao Kong, Bingjie Chen, Haili He, Kun Lan, Yang Liu, Jinhua Yang, and Dongyuan Zhao**

## Supplemental Data Items

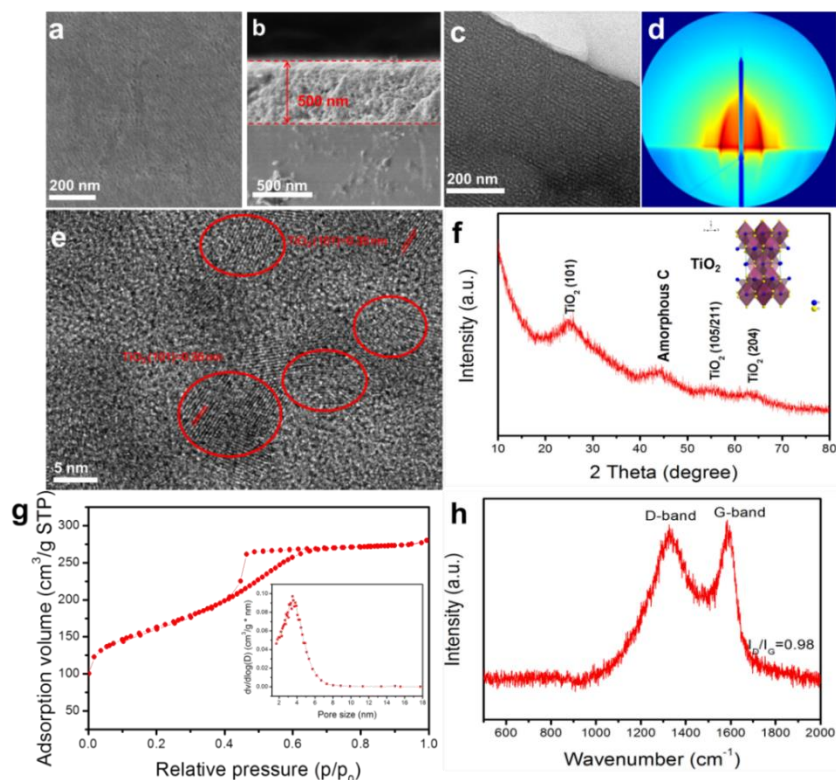

**Figure S1. Structure and composition characterizations of the mesoporous  $\text{TiO}_2\text{@C}$  membranes, related to Figure 2.**

Top-view SEM image (a), cross-section SEM image (b), low-magnification TEM image (c), GISAXS image (d), high-resolution TEM (HRTEM) image (e), XRD pattern (f), BET analysis (g), and Raman spectrum (h) of the mesoporous  $\text{TiO}_2\text{@C}$  membranes. The inset in (f) shows the molecule structure of  $\text{TiO}_2$ . The inset in (g) is pore size distribution.

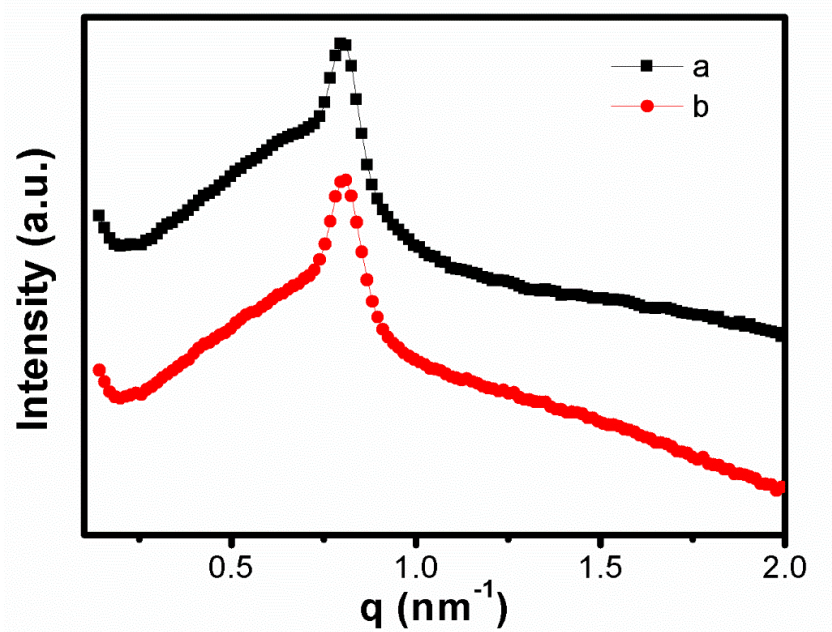

**Figure S2. Small angle X-ray diffraction (SAXS), related to Figure 2**  
SAXS patterns of the mesoporous TiO<sub>2</sub>@C (a) and TiO<sub>2</sub>/TiC@C (b) membranes.

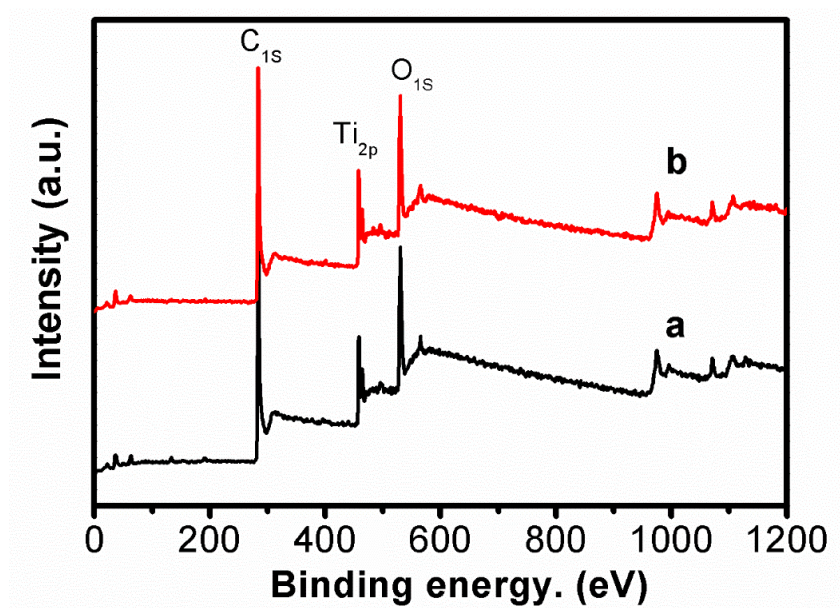

**Figure S3. X-ray photoelectron spectroscopy (XPS), related to Figure 2.**  
XPS spectra of the mesoporous  $TiO_2@C$  (a) and  $TiO_2/TiC@C$  (b) membranes.

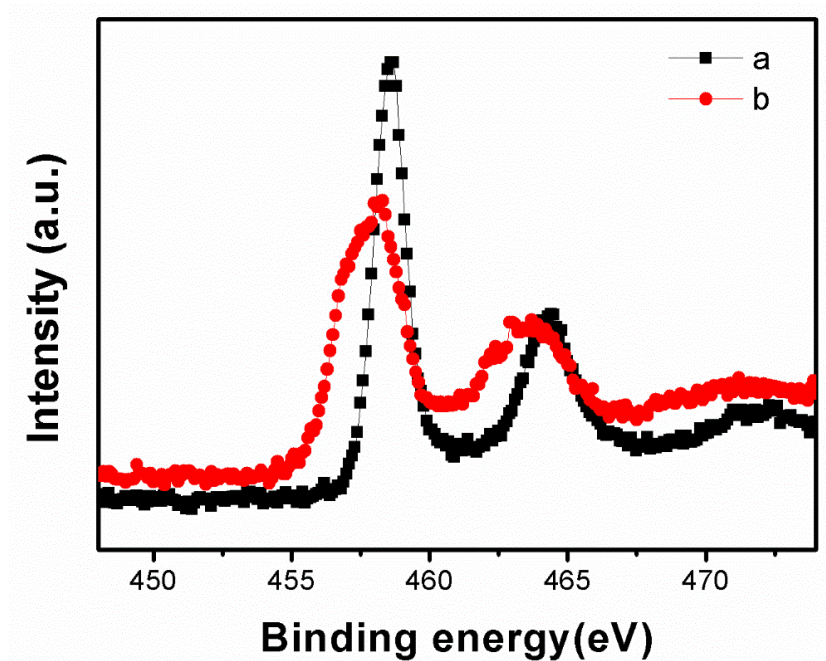

**Figure S4. High-resolution XPS spectra, related to Figure 2.**

High-resolution XPS spectra of Ti 2p core level for the  $\text{TiO}_2@\text{C}$  (a) and  $\text{TiO}_2/\text{TiC}@\text{C}$  (b) membranes.

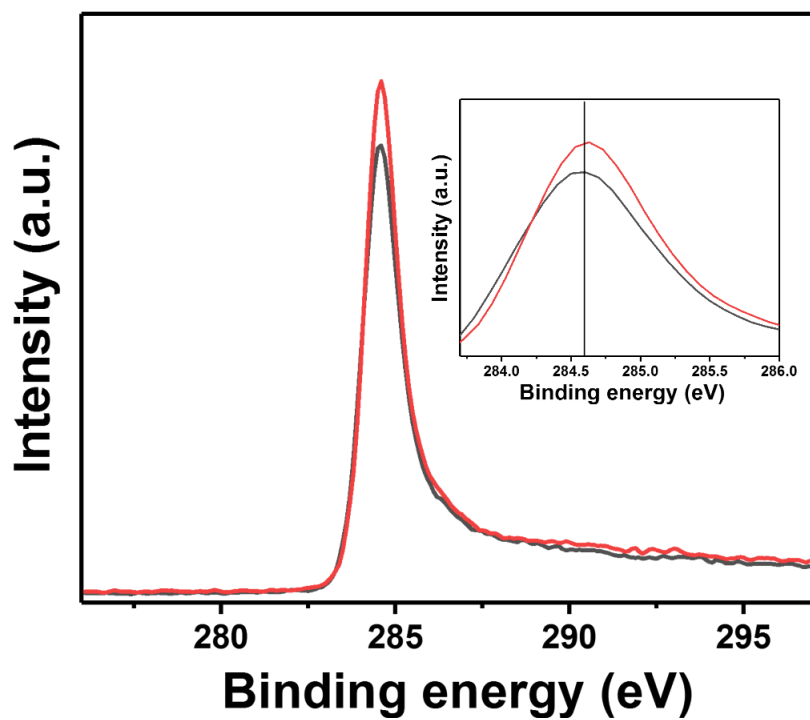

**Figure S5. High-resolution XPS spectra, related to Figure 2.**  
High-resolution XPS spectra of C1s core level for the TiO<sub>2</sub>@C (a) and TiO<sub>2</sub>/TiC@C (b) membranes.

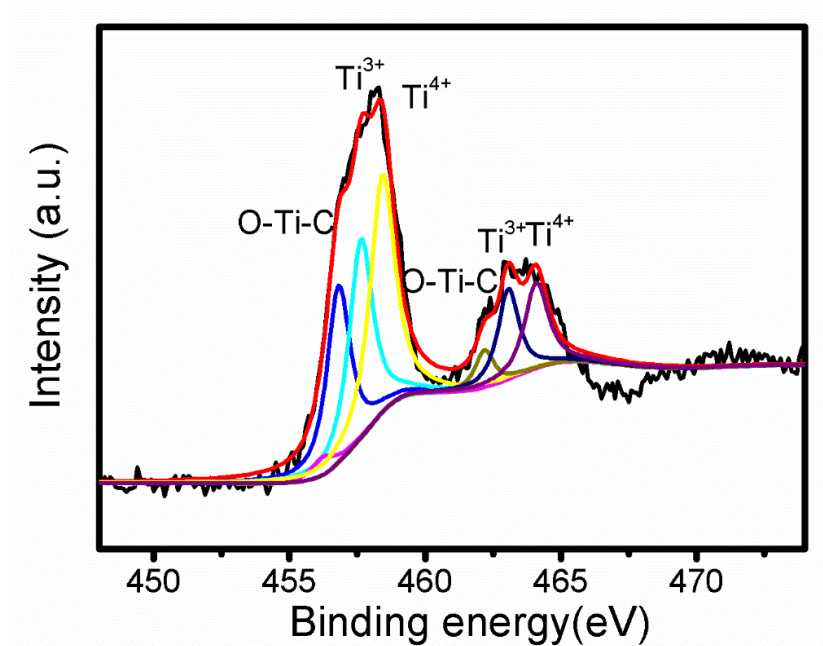

**Figure S6. High-resolution XPS spectra, related to Figure 2.**

The high-resolution XPS spectrums of Ti 2p core level for the mesoporous TiO<sub>2</sub>/TiC@C membranes. The HRXPS contained six components at 456.8, 457.7, 458.5, 462.2, 463.1 and 464.2 eV are consistent with O-Ti-C, Ti<sup>3+</sup>, Ti<sup>4+</sup>, O-Ti-C, Ti<sup>3+</sup>, and Ti<sup>4+</sup>, respectively.

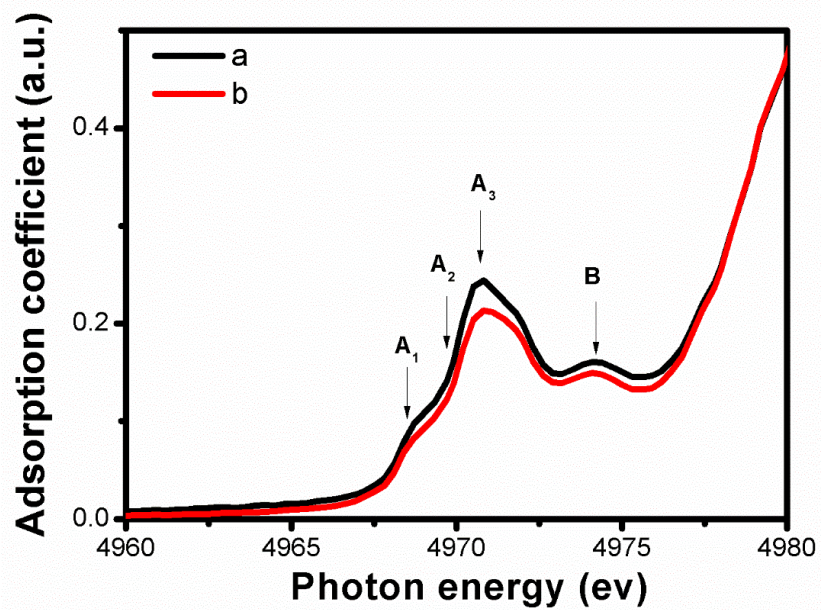

**Figure S7. X-ray absorption fine structure spectroscopy (XAFS), related to Figure 2.**  
The Ti K-edge pre-edge XAFS of the mesoporous TiO<sub>2</sub>@C (a) and TiO<sub>2</sub>/TiC@C (b) membranes.



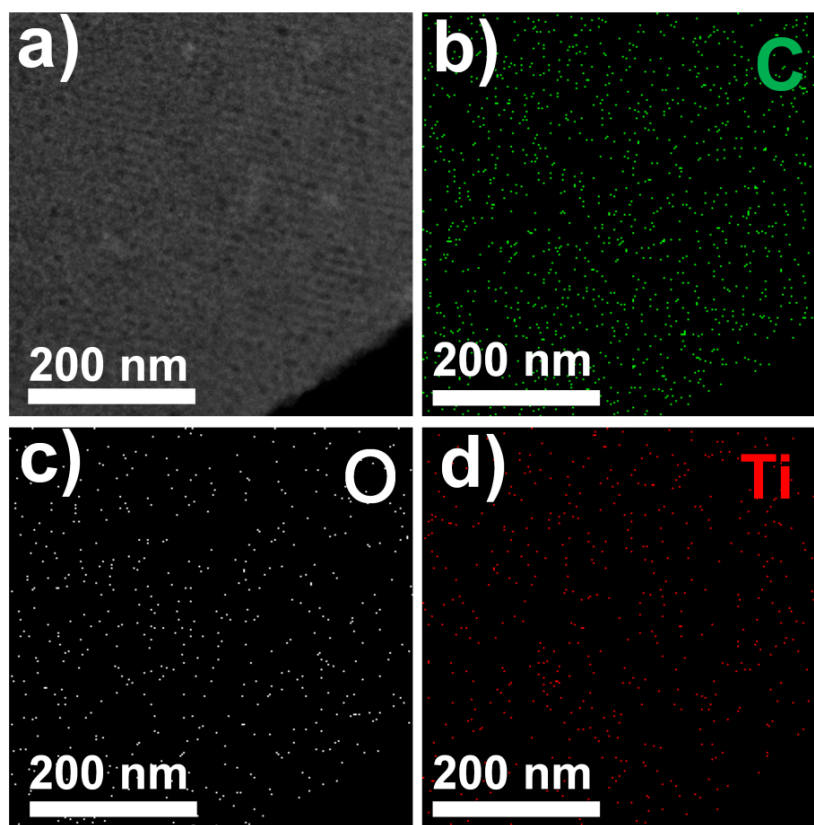

**Figure S8. Elemental mapping, related to Figure 2.**

The elemental mapping of the mesoporous  $\text{TiO}_2@\text{C}$  membranes. HAADF-STEM (a) image and energy-dispersive X-ray element mapping of C (b), O (c), and Ti (d) elements.

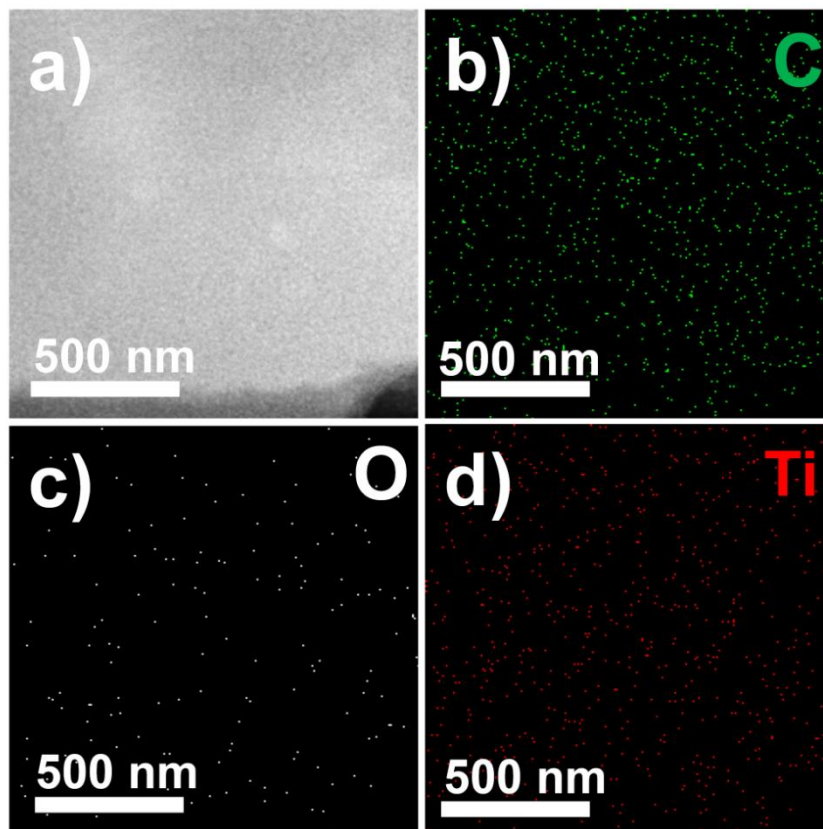

**Figure S9. Elemental mapping, related to Figure 2.**

The elemental mapping of the mesoporous  $\text{TiO}_2/\text{TiC@C}$  membranes. HAADF-STEM (a) image and energy-dispersive X-ray element mapping of C (b), O (c), and Ti (d) elements.

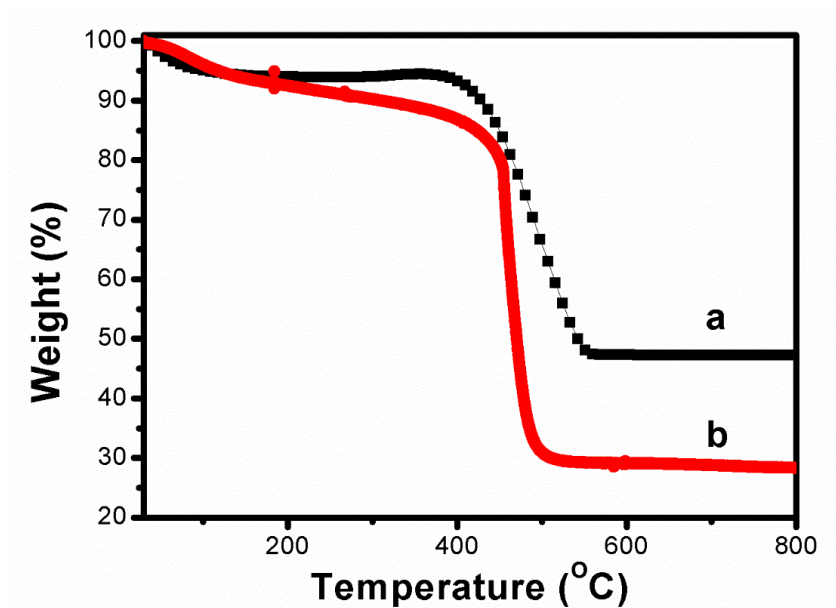

**Figure S10.** Thermogravimetric analysis, related to Figure 2.

The thermogravimetric analysis curves of the mesoporous TiO<sub>2</sub>/TiC@C membranes before (a) and after (b) the removal of TiO<sub>2</sub> nanocrystals by concentrated sulfuric acid.

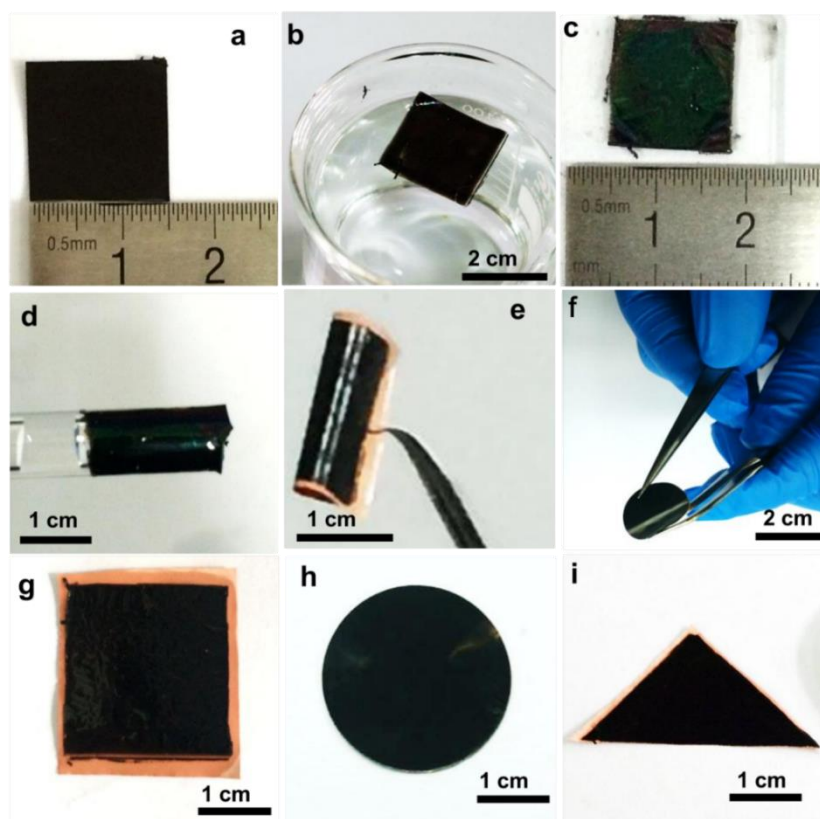

**Figure S11. Transferability, flexibility, tailorability of the mesoporous membranes, related to Figure 2.**

Photographs of the mesoporous  $\text{TiO}_2/\text{TiC@C}$  membranes formed on silicon wafer (a), floating on water (b), transferred onto glass substrate (c), transferred onto a cylindrical substrate (d), bent without cracks (e, d), and tailored to different shapes (g, h, i).

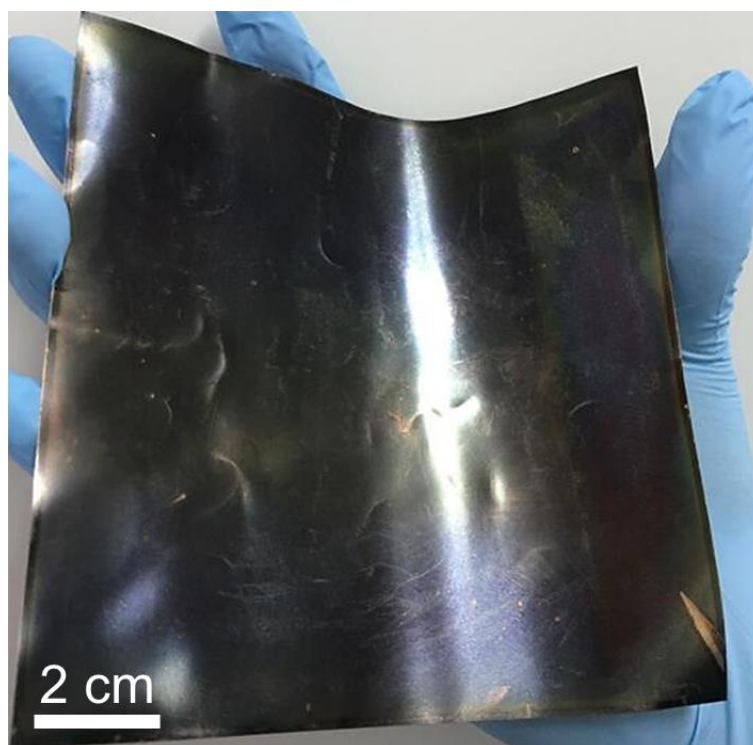

**Figure S12. Processing scalability of the mesoporous membranes, related to Figure 2.**

Photograph of the mesoporous  $\text{TiO}_2/\text{TiC}@C$  membranes formed on a large Ti foil of  $144 \text{ cm}^2$ .

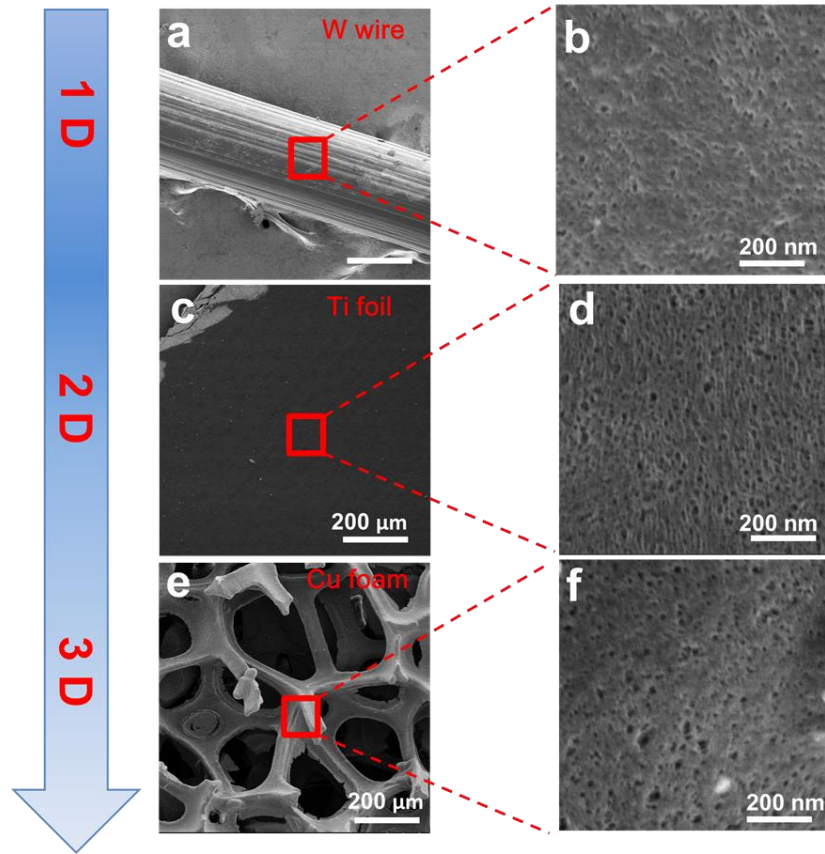

**Figure S13. Processing feasibility of the mesoporous membranes, related to Figure 2.**  
SEM images of mesoporous  $\text{TiO}_2/\text{TiC}@C$  membranes formed on different substrates. (a,b) W wires, (c,d) Ti foils and (e,f) Cu foams.

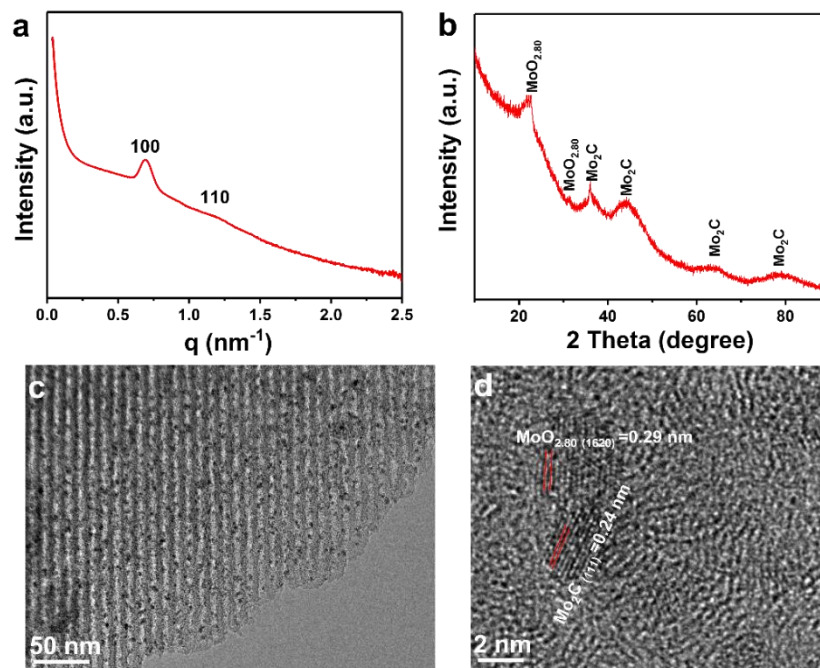

**Figure S14. Extension of the synthetic strategy, related to Figure 2.**  
 SAXS (a), XRD (b), TEM (c) and HRTEM (d) images of mesoporous  $\text{MoO}_{2.80}/\text{Mo}_2\text{C}@C$  composites.

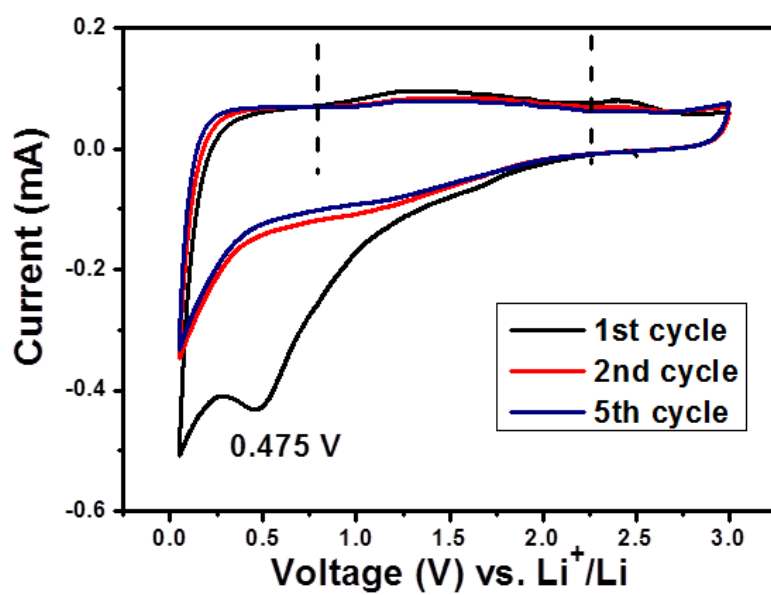

**Figure S15. Electrochemical performance of the mesoporous TiO<sub>2</sub>@C membranes, related to Figure 3.**

Cyclic voltammograms of the mesoporous TiO<sub>2</sub>@C membranes electrodes in a voltage range of 0.01–3 V at a scanning rate of 1 mV·s<sup>-1</sup>.



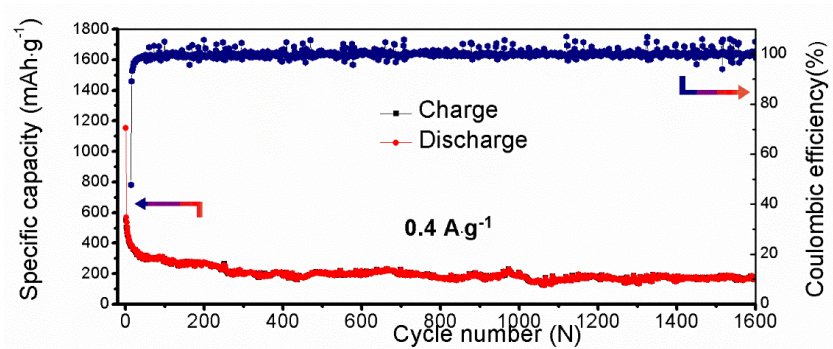

**Figure S16. Electrochemical performance of the mesoporous TiO<sub>2</sub>@C membranes, related to Figure 3.**

Cycling performances of the mesoporous TiO<sub>2</sub>@C membranes at a current density of 0.4 A·g<sup>-1</sup>.

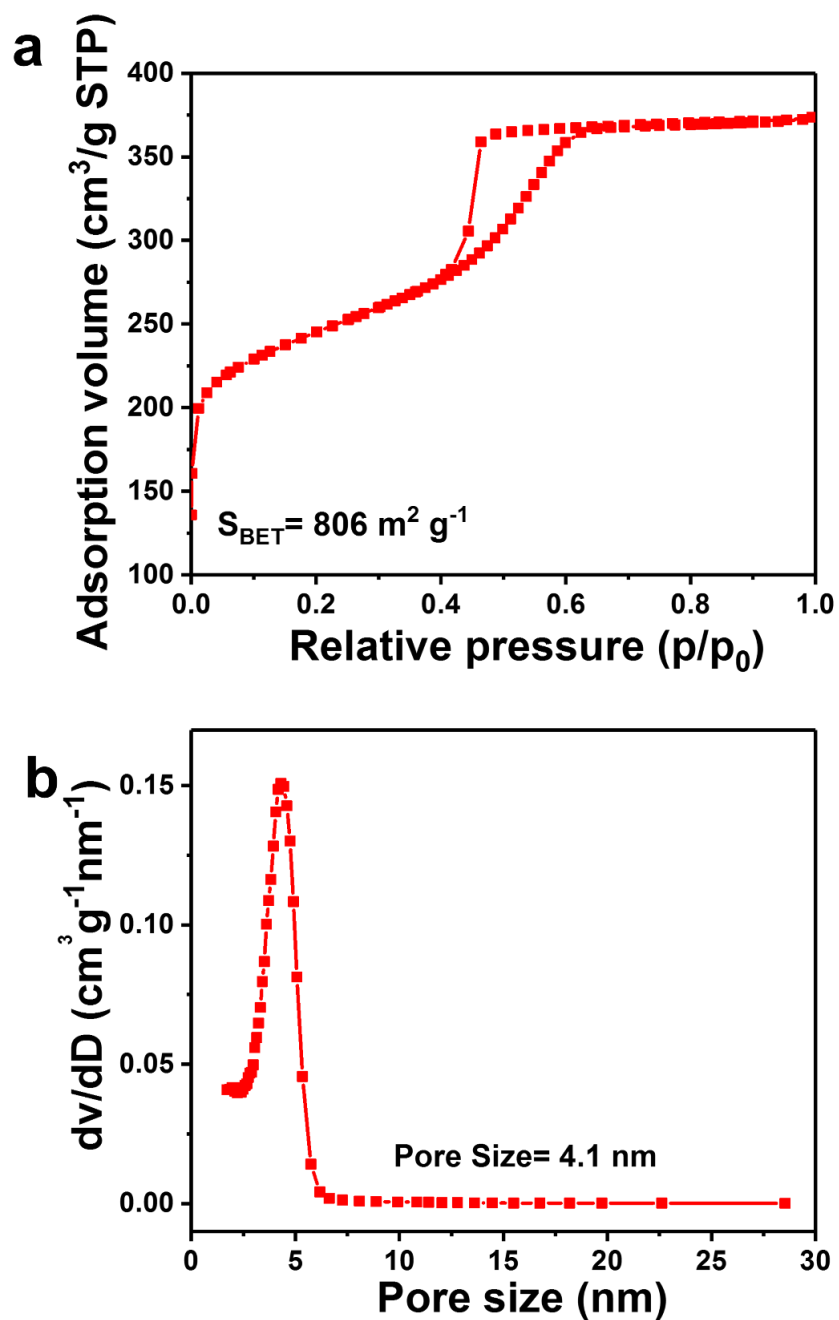

**Figure S17. Structure characterizations of the mesoporous carbon, related to Figure 3.**

N<sub>2</sub> adsorption-desorption isotherms (a) and the corresponding pore size distribution (b) of the mesoporous carbon annealed at 900 °C.

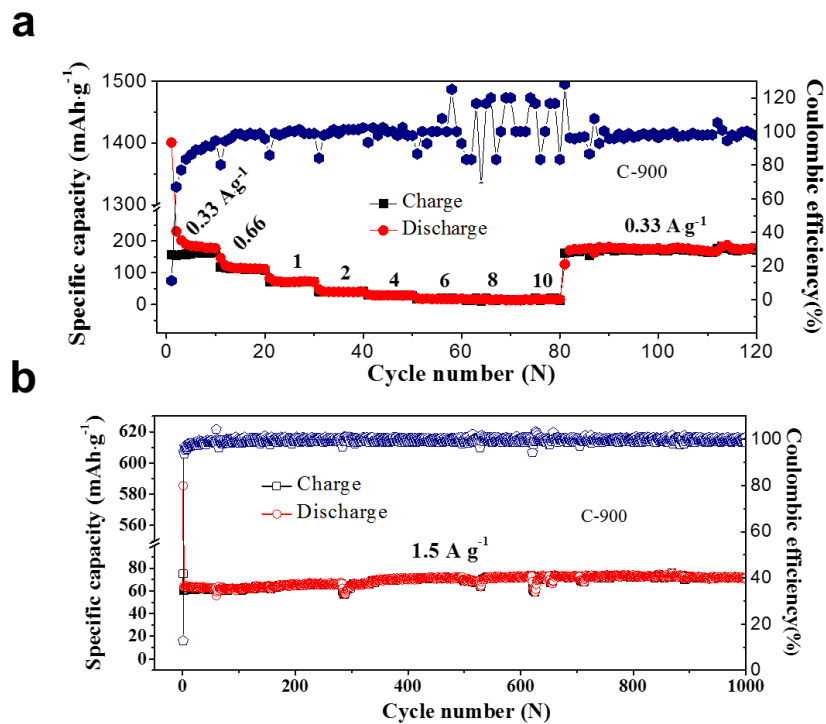

**Figure S18. Electrochemical performances of the mesoporous carbon, related to Figure 3.**

(a) Rate performance of mesoporous carbon annealed at 900 °C. (b) Cycling performance of mesoporous carbon annealed at 900 °C.

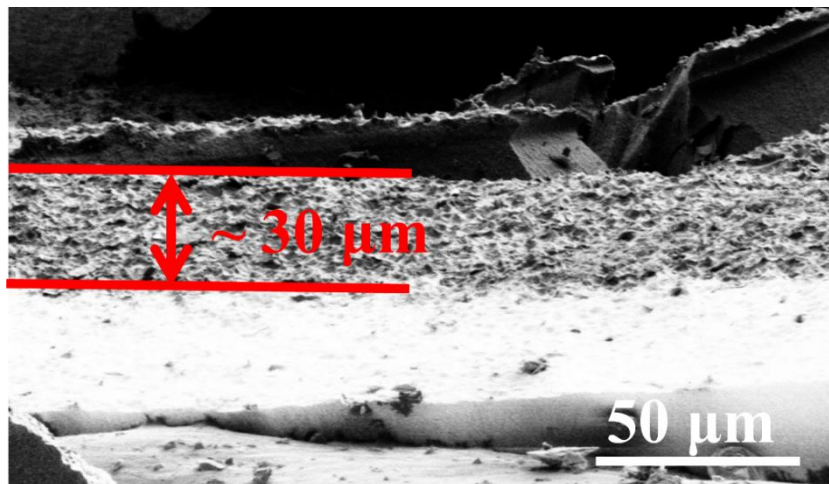

**Figure S19. Structure characterizations of the thicker mesoporous  $\text{TiO}_2/\text{TiC}@C$  membrane, related to Figure 3.**

Cross-section SEM image of the mesoporous  $\text{TiO}_2/\text{TiC}@C$  membranes with a thickness of  $\sim 30 \mu\text{m}$  synthesized at 100 rpm for 5 s.

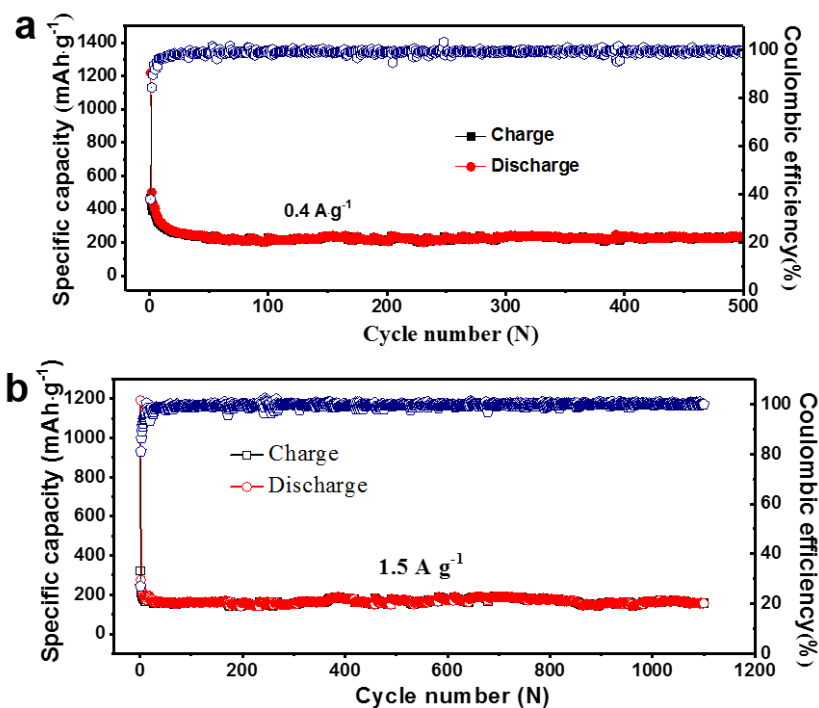

**Figure S20. Electrochemical performances of the thicker mesoporous  $\text{TiO}_2/\text{TiC}@C$  membranes, related to Figure 3.**

Cycling performance of the mesoporous  $\text{TiO}_2/\text{TiC}@C$  membranes with a thickness of  $\sim 30\ \mu\text{m}$  at current densities of  $0.4$  (a) and  $1.5\text{ A}\cdot\text{g}^{-1}$  (b), respectively.

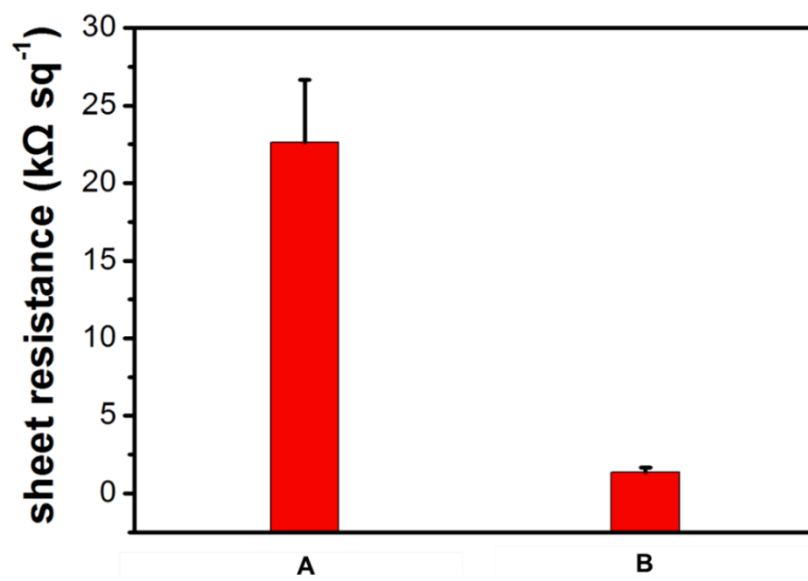

**Figure S21. Sheet resistances, related to Figure 3.**

The sheet resistances of the mesoporous TiO<sub>2</sub>@C (A) and TiO<sub>2</sub>/TiC@C (B) membranes.

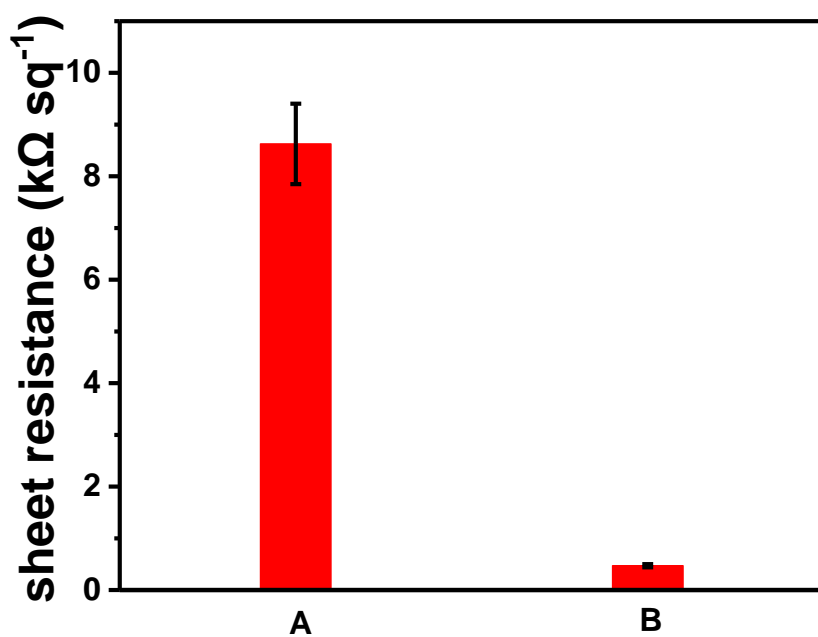

**Figure S22. Sheet resistances, related to Figure 3.**

The sheet resistances of the mesoporous carbon membranes calcination at 700 (A) and 900 °C (B), respectively.

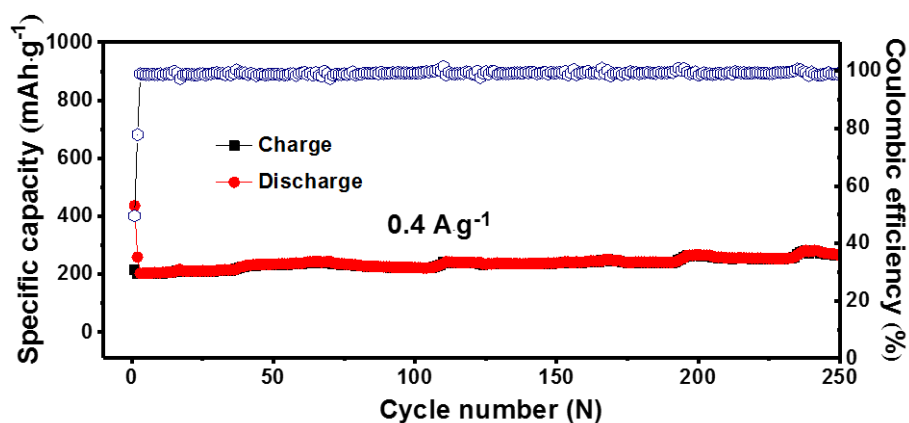

**Figure S23. Electrochemical performance of the mesoporous TiO<sub>2</sub>/TiC@C membrane after prelithiation, related to Figure 3.**

Cycling performance of the mesoporous TiO<sub>2</sub>/TiC@C membranes electrodes at current densities of 0.4 A·g<sup>-1</sup> after prelithiation. The initial coulomb efficiency is increasing from 35.3 to 49.6% after prelithiation.



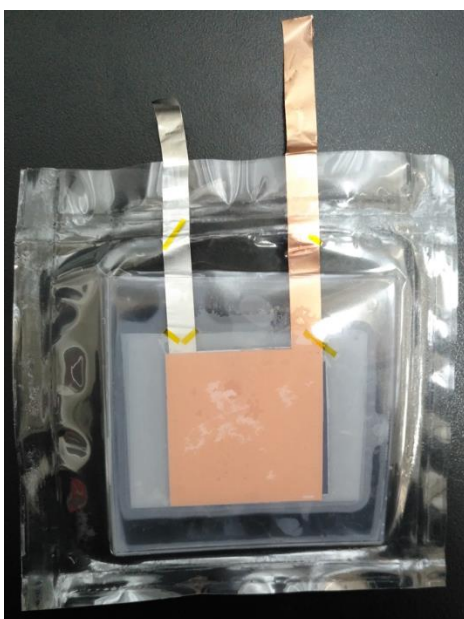

**Figure S24. Flexible full battery, related to Figure 3.**

Photograph of the flexible full battery assembled by using the  $\text{TiO}_2/\text{TiC}@C$  membranes as the anode (Cu foil as the current collector) and commercial  $\text{LiCoO}_2$  loaded on Al foil as the cathode.

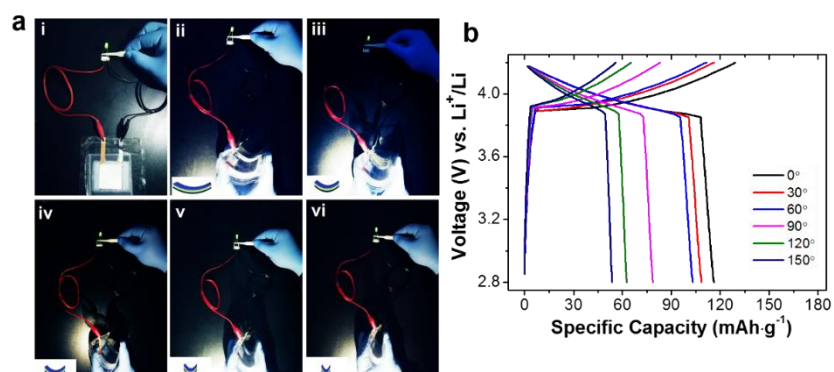

**Figure S25. Electrochemical performance of the flexible full battery, related to Figure 3.**

(a) Photographs of the flexible full battery with different bent angles and a LED can be stably lit. The bent angle is measured to be 0 (i), 30 (ii), 60 (iii), 90 (iv), 120 (v) and 150°(vi), respectively. (b) Charge/discharge curves of the flexible full battery with different bent.

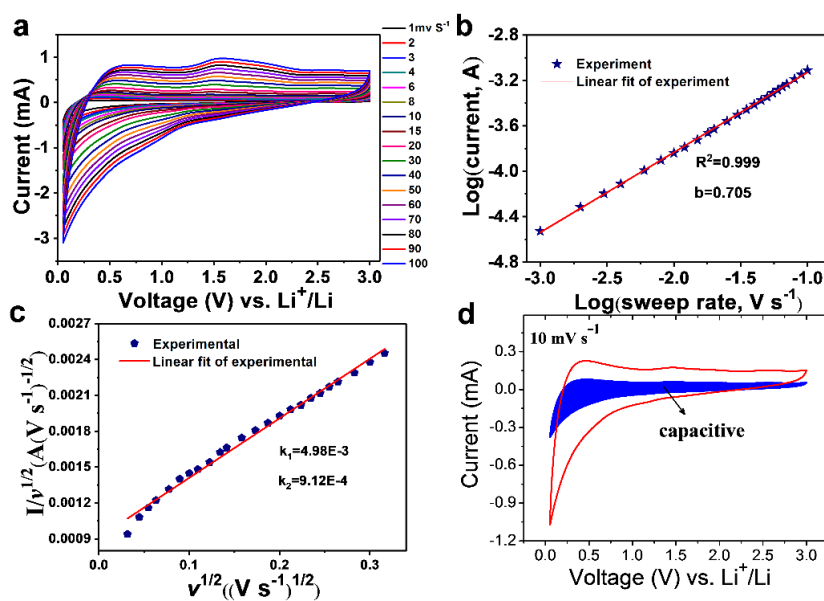

**Figure S26. Electrochemical kinetics analysis of the mesoporous carbon, related to Figure 4.**

(a) CV curves at various scan rates from 2 to 200  $\text{mV s}^{-1}$  of the mesoporous carbon membranes. (b)  $\text{Log}(i)$  vs.  $\text{log}(v)$  plots of the cathodic current response at  $\sim 2.05 \text{ V}$  of the mesoporous carbon membrane electrodes. (c).  $I/\text{scan rate}^{1/2}$  versus  $\text{scan rate}^{1/2}$ . (d) Separation of the capacitive and diffusion currents in the mesoporous carbon membrane electrodes at a scan rate of  $10 \text{ mV s}^{-1}$ .

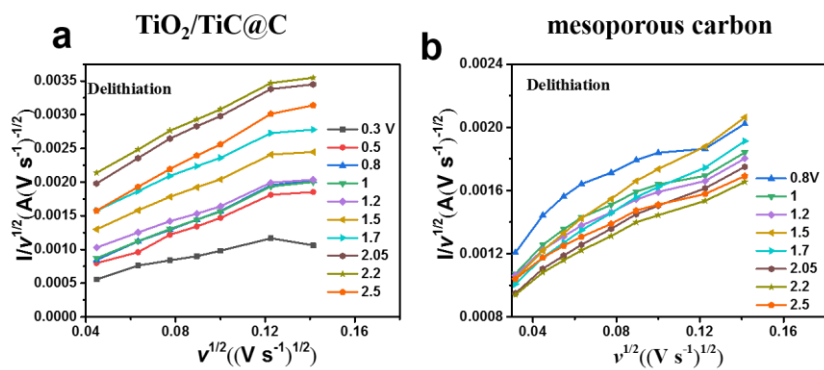

**Figure S27. Electrochemical kinetics analysis of the mesoporous carbon and  $\text{TiO}_2/\text{TiC}@C$  c membranes, related to Figure 4.**

CV curves of (a) mesoporous carbon, (b)  $\text{TiO}_2/\text{TiC}@C$  membranes at different scan rates, and corresponding plots of  $v^{1/2}$  vs.  $i/v^{1/2}$  used for calculating constants  $k_1$  and  $k_2$  at different potentials.

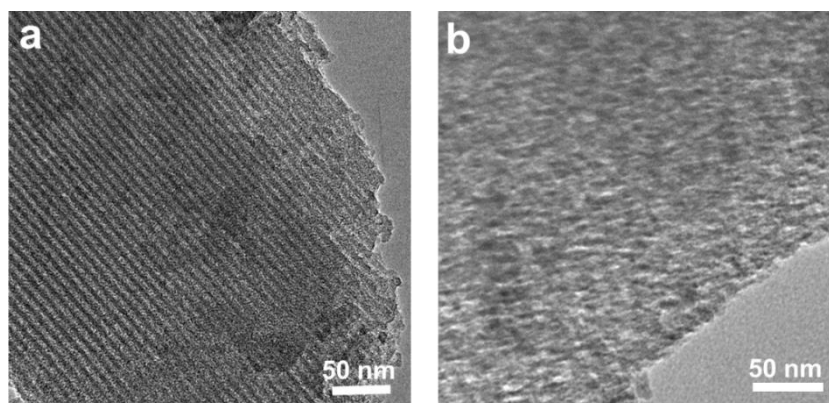

**Figure S28. Structural evolution of the mesoporous carbon, related to Figure 5.** TEM images of the mesoporous carbon before (a) and after (b) 1000 cycles at the current density of  $0.4 \text{ A}\cdot\text{g}^{-1}$ .

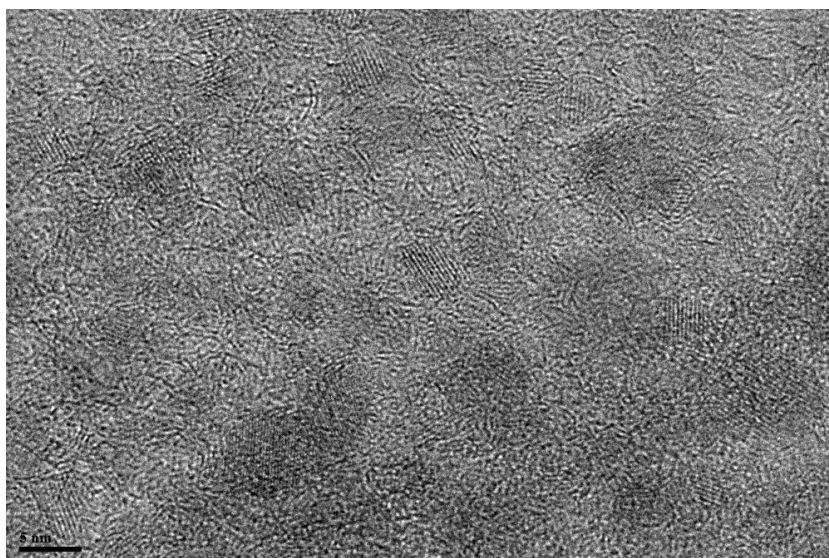

**Figure S29. Structural evolution of the mesoporous TiO<sub>2</sub>/TiC@C membranes, related to Figure 5.**

HRTEM image of the mesoporous TiO<sub>2</sub>/TiC@C membranes after 1,600 cycles at the current density of 0.4 A·g<sup>-1</sup>.

**Table S1. Structural and textural properties of the mesoporous TiO<sub>2</sub>@C and TiO<sub>2</sub>/TiC@C membranes, related to Figure 2.**

|                              | $S_{BET}$ (m <sup>2</sup> /g) | $S_{Micro}$ (m <sup>2</sup> /g) | $V$ (cm <sup>3</sup> /g) | $Dp$ (nm) |
|------------------------------|-------------------------------|---------------------------------|--------------------------|-----------|
| <i>TiO<sub>2</sub>/C</i>     | 501                           | 147                             | 0.38                     | 4.02      |
| <i>TiO<sub>2</sub>/TiC@C</i> | 674                           | 276                             | 0.42                     | 3.78      |

**Table S2. A summary for the cycling performance of the ordered mesoporous TiO<sub>2</sub>/C and TiO<sub>2</sub>@TiC/C membranes, related Figure 3.**

|                              | <i>Current density</i><br>(A g <sup>-1</sup> ) | <i>Capacity*</i>                                      |                                                      | <i>Capacity retention</i><br>(%) | <i>Coulombic efficiency</i><br>(%) | <i>Cycle number</i> |
|------------------------------|------------------------------------------------|-------------------------------------------------------|------------------------------------------------------|----------------------------------|------------------------------------|---------------------|
|                              |                                                | <i>Gravimetric capacity</i><br>(mAh·g <sup>-1</sup> ) | <i>Volumetric capacity</i><br>(mAh·cm <sup>2</sup> ) |                                  |                                    |                     |
| <i>TiO<sub>2</sub>/TiC@C</i> | 0.4                                            | 244                                                   | 705                                                  | 85.1                             | 99.3                               | 1600 <sup>th</sup>  |
|                              | 1.5                                            | 150                                                   | 434                                                  | 68.4                             | 99.4                               | 5000 <sup>th</sup>  |
| <i>TiO<sub>2</sub>/C</i>     | 0.4                                            | 161                                                   | 465                                                  | 38.7                             | 99.7                               | 1600 <sup>th</sup>  |

\*The results summarized from Figure 3c in the manuscript and Figure S16 in the supporting information. The capacities are calculated by active materials.



**Table S3. Rate performance comparison between the TiO<sub>2</sub>/TiC@C composite and mesoporous carbon, related Figure 3.**

| <i>Current density (A g<sup>-1</sup>)</i> | <i>Capacity (mA g<sup>-1</sup>)</i> |                               | <i>Capacity ratio MC/TTC</i> |
|-------------------------------------------|-------------------------------------|-------------------------------|------------------------------|
|                                           | <i>TiO<sub>2</sub>/TiC@C (TTC)</i>  | <i>mesoporous carbon (MC)</i> |                              |
| 0.33                                      | 278                                 | 163                           | 0.58                         |
| 0.66                                      | 250                                 | 107                           | 0.43                         |
| 1                                         | 179                                 | 71                            | 0.4                          |
| 2                                         | 138                                 | 40                            | 0.29                         |
| 4                                         | 105                                 | 28                            | 0.27                         |
| 6                                         | 80                                  | 17                            | 0.21                         |
| 8                                         | 60                                  | 16                            | 0.27                         |
| 10                                        | 56                                  | 13                            | 0.24                         |
| 0.33                                      | 280                                 | 170                           | 0.61                         |

\*The result summarized from Figure 3b in the manuscript and Figure S19 in the supporting information.

## Transparent Methods

### Materials Synthesis

**Preparation of resol precursors:** The phenolic resol precursors were prepared according to the previous report (Zhao et al., 2005). In a typical synthesis, 8.0 g of phenol was melted in a flask at 45 °C and then mixed with 1.68 g of NaOH solution (20 wt %) under stirring. After 10 min, 13.76 g of formalin (37 wt % formaldehyde) was added dropwise. Upon further stirring for 1 h at 70 °C, the mixture was cooled down to room temperature. The pH value was adjusted to ~7.0 by using 2.0 M HCl solution. Then the water was removed under vacuum at 49 °C. Finally, ethanol was added to precipitate NaCl and dissolve the resol to obtain a 20 wt % solution.

**Preparation of titanium citrate complex:** The preparation procedure for titanium citrate complex was similar to the previous report (Waterland et al., 2004). For a typical preparation, 28.4 g (100 mmol) of titanium isopropoxide was dissolved in 50 mL of ethanol (solution A) and 21.0 g (100 mmol) of citric acid was dissolved in 100 mL of ethanol (solution B). Solution B was dropped into the solution A under stirring at 40 °C for 2 h. Ethanol was then removed by rotary evaporation at 40 °C then white powders were obtained. Water was added to dissolve the white powders to obtain 1.0 M homogeneous solution.

The mesoporous TiO<sub>2</sub>@C and TiO<sub>2</sub>/TiC@C composite membranes were synthesized *via* a universal strategy by using the phenolic resol (see Supplemental Experimental Procedures for details), pluronic F127 and the titanium citrate complex (see Supplemental Experimental Procedures for details) as a carbon precursor, template and titanium precursor, respectively. The silicon wafers were first treated with piranha solution (98% sulfuric acid:30% hydrogen peroxide = 2:1 v/v) at 90 °C for 30 min to form a thin silica oxide layer on the surface as substrates. In a typical synthesis, 1.5 g of F127, 2.5 g of the resol and 3.0 g of the titanium citrate solution were dissolved in 16 mL of water/ethanol mixture (1:1 v/v). After stirring for 30 min at room temperature, the solution was coated onto the pretreated silicon wafer (2 cm × 2 cm) at 600 rpm for 10 s to form a thin film. The film was dried at 40 °C for 3–5 h, followed by aging at 100 °C for another 24 h. The mesoporous TiO<sub>2</sub>@C and TiO<sub>2</sub>/TiC@C composite membranes on the silicon wafer were obtained after pyrolyzing at 700 and 900 °C for 2 h in nitrogen, respectively. The ramping rate was 1 °C min<sup>-1</sup> below 600 °C, and 5 °C min<sup>-1</sup> above 600 °C. To obtain free standing membranes, a polymethyl methacrylate (PMMA) solution was spin-coated onto the composite membranes to increase the toughness. Afterward, the obtained membranes supported by PMMA thin films were immersed into a potassium hydroxide solution (10 wt %) at room temperature for 8–10 h to etch the silica layer on the surface of silicon wafer. After the PMMA film was dissolved by anisole, the free-standing membranes with a size of 2 cm × 2 cm were obtained.

### Electrochemical Measurements

The electrochemical performances of the membrane electrodes were evaluated in 2016-type coin cells. The cells were set up by using the mesoporous TiO<sub>2</sub>/TiC@C composite membranes standing on copper foils as work electrodes and commercial lithium disks as the counter electrodes, respectively. A non-aqueous solution of 1.0 M LiPF<sub>6</sub> in a 1:1:1

of ethylene carbonate (EC), diethyl carbonate (DEC), and dimethyl carbonate (DMC) was used as the electrolyte. For a flexible full cell, the commercial LiCoO<sub>2</sub> coating on aluminum foil was used as the counter electrode. The electrode was dried at 80 °C overnight at a vacuum oven before assembly. All the cells were assembled in a glove box with [O<sub>2</sub>], [H<sub>2</sub>O] ≤ 1 ppm. Specific capacities were calculated based on the weight of membranes (~ 5 μm, ~0.5 mg). The galvanostatic charge/discharge test was conducted on LAND cycler (Wuhan LAND electronics Co., China) under ambient temperature. Cyclic voltammetry measurements were carried out at a scan rate of 1 mV·s<sup>-1</sup> under the voltage range of 0.01 ~ 3 V by using a CHI 660e electrochemical workstation (Chen-Hua Instruments Co., China). Electrochemical impedance spectra were recorded using the Solatron 1260/1287 Electrochemical Interface (Solatron Metrology, UK) with oscillation amplitude of 5 mV at the frequency range from 100 mHz to 100 kHz.

### **Full Battery Assembly**

To assemble a flexible full battery, a 30 × 30 mm<sup>2</sup> TiO<sub>2</sub>/TiC@C anode was coupled with a LiCoO<sub>2</sub> cathode, which was prepared by coating conventional LiCoO<sub>2</sub> nanoparticle slurry on an Al foil (mass loading: ~ 3.0 mg cm<sup>-2</sup>). Prior to the assembly, the TiO<sub>2</sub>/TiC@C anode was prelithiated by placing it in direct contact with a wet Li foil and the electrolyte for 12 h to compensate its large initial irreversible capacity. The mass ratio of the TiO<sub>2</sub>/TiC@C and LiCoO<sub>2</sub> in the full battery was adopted as 1:2, considering the difference in specific capacity of the two electrodes. The specific capacity is calculated based on the LiCoO<sub>2</sub> mass because the battery is cathode-limited. The battery was packaged with a flexible polyethylene foil bag by edge bonding machine, and the same electrolyte as used in the coin cells was injected when placed inside an argon-filled glovebox. The full batteries were cycled in the range of 2.8 – 4.2 V on LAND galvanostatic charge/discharge instruments.

### **Material Characterization**

X-ray diffraction (XRD) patterns were collected by a Bruker D8 powder X-ray diffractometer (Germany) with Cu Kα radiation (40 kV, 40 mA). Small-angle X-ray scattering (SAXS) patterns were recorded by a Nanostar U small-angle scattering system (Bruker, Germany) with Cu Kα radiation (40 kV, 35 mA). GISAXS measurements were carried out at beamline BL16B1 of Shanghai Synchrotron Radiation Facility (SSRF). The incident X-ray photon energy was 10 keV and a MAR165 area detector was used to record the scattering intensity. The *d*-spacing values were calculated using the formula  $d = 2\pi/q$ , where  $q = 4\pi (\sin \theta)/\lambda$ . Field emission scanning electron microscopy (FESEM) images were obtained on a Hitachi S4800 field-emission SEM (Japan) operated at 1 kV and 10 μA. Transmission electron microscope (TEM) measurements were conducted on a JEOL 2100F microscope (Japan) at 200 kV. For TEM measurements, the samples were prepared by sonication in ethanol and suspended on holey carbon grids. N<sub>2</sub> adsorption-desorption isotherms were measured with a Micromeritics Tristar 2420 analyzer at 77 K. Before measurements, the samples were degassed at 180 °C for more than 5 h. The Brunauer-Emmett-Teller (BET) method was utilized to calculate the specific surface areas. The pore size distributions were derived from the desorption branches of the isotherms based on Barrett-Joyner-Halenda (BJH) model. The total pore volumes were estimated from the

amount adsorbed at a relative pressure ( $P/P_0$ ) of 0.995. Thermogravimetric analysis (TGA) curves were carried out using a Mettler Toledo TGA-SDTA851 analyzer (Switzerland) from 30 to 800 °C in an air flow of 80 mL min<sup>-1</sup> at a heating rate of 10 °C min<sup>-1</sup>.

**Supplemental References:**

Meng, Y., Gu, D., Zhang, F., Shi, Y., Yang, H., Li, Z., and Zhao, D. (2005). Ordered mesoporous polymers and homologous carbon frameworks: amphiphilic surfactant templating and direct transformation. *Angew. Chem. Int. Ed.* 44, 7053-7059.

Kemmitt, T., Al-Salim, N.I., Gainsford, G.J., Bubendorfer, A. and Waterland, M. (2004). Unprecedented oxo-titanium citrate complex precipitated from aqueous citrate solutions, exhibiting a novel bilayered Ti<sub>8</sub>O<sub>10</sub> structural core. *Inorg. Chem.* 43, 6300-6306.
